# Supplementary material
Source: Springer Nature journal article supplement (https://www.springermedizin.de/resource/supplementary/12911_2014_826_MOESM2_ESM.pdf/9526740)
Supplement: MOESM2 [file 9526740]

HopSCOTCH advertised through GP networks

Expressed interest (n=70)

Recruited to HopSCOTCH trial (n=44)

Excluded (n=9)  
GP enrolled but no patients  
enrolled

HopSCOTCH GP sample (n=35)

Withdrawn (n=3)

Delivered intervention (n=30)  
Functional software (n=23)  
Pen and paper version (n=7)

Did not deliver intervention or use software, as  
no child randomised to intervention (n=2)

Lost to follow-up (n=3)
